# Supplementary material for: Modulating the thermal properties of poly(hydroxybutyrate) by the copolymerization of rac-β-butyrolactone with lactide
Source: Royal Society of Chemistry journal article supplement (doi:10.1039/c6nj00298f), 2016-01-01
Supplement: c6nj00298f1.pdf [file c6nj00298f1.pdf]

*New Journal of Chemistry*

**Supplementary Information**

Modulating the thermal properties of poly(hydroxybutyrate) by the  
copolymerization of *rac*- $\beta$ -butyrolactone with lactide

Jenny Fagerland<sup>a</sup>, Anna Finne Wistrand<sup>a</sup>, Daniela Pappalardo<sup>\*a,b</sup>

<sup>a</sup>*Department of Fiber and Polymer Technology, KTH, Royal Institute of Technology,  
Stockholm, Sweden*

<sup>b</sup>*Dipartimento di Scienze e Tecnologie, via dei Mulini 59/A, 82100 Benevento, Italy*

Email: [danpa@kth.se](mailto:danpa@kth.se), [pappalardo@unisannio.it](mailto:pappalardo@unisannio.it)

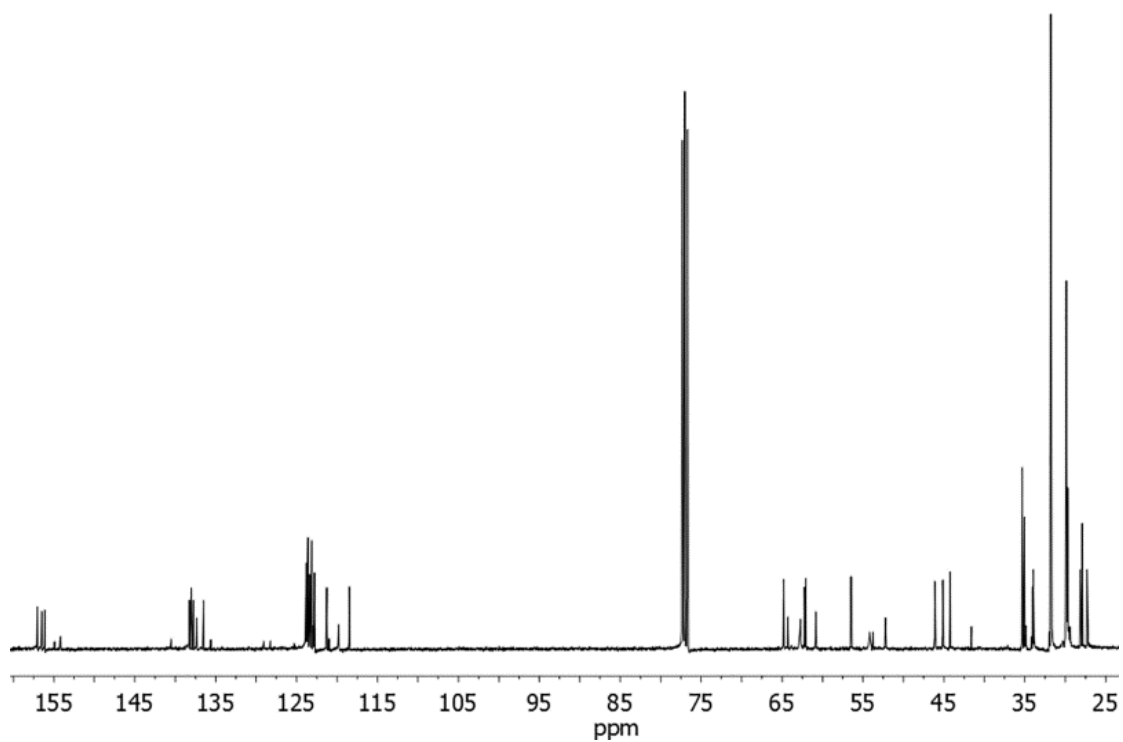

**Fig. S1**  $^{13}\text{C}$ -NMR spectrum ( $\text{CDCl}_3$ ,  $25^\circ\text{C}$ ) of the *salan*-aluminum compound (**2**).

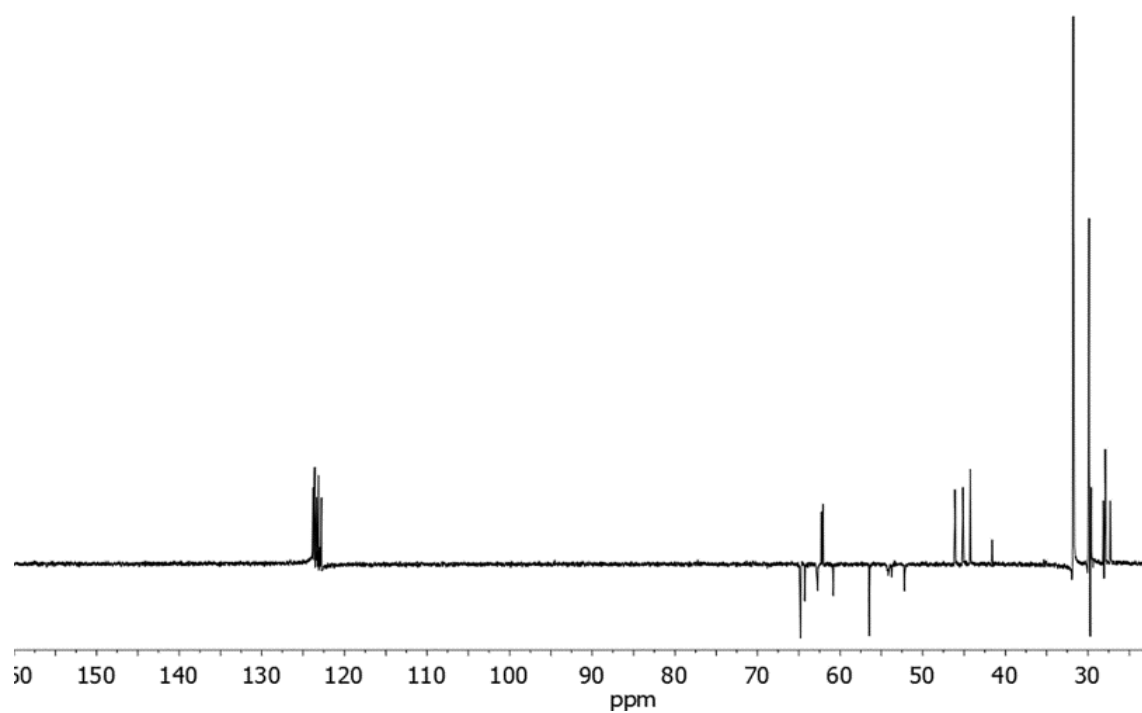

**Fig. S2** DEPT135 NMR spectrum (CDCl<sub>3</sub>, 25°C) of the *salan*-aluminum compound (2).

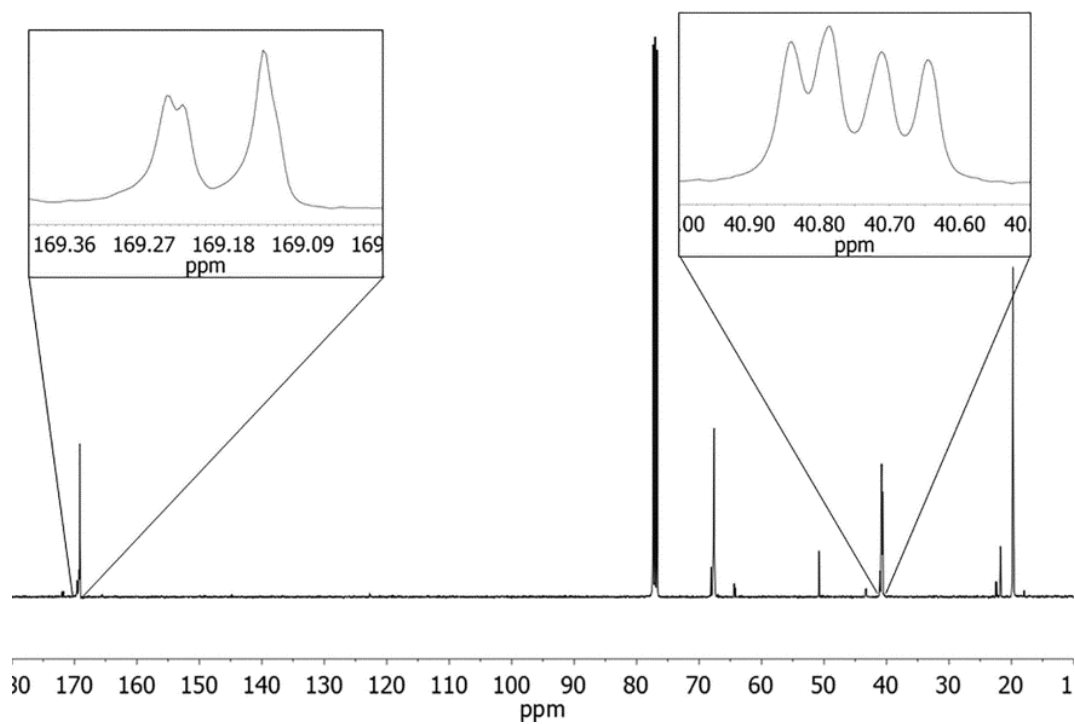

**Fig. S3.**  $^{13}\text{C}$ -NMR spectrum ( $\text{CDCl}_3$ ;  $25^\circ\text{C}$ ) of poly(3-hydroxybutyrate) prepared in the presence of *salan*-aluminum compound (**2**).

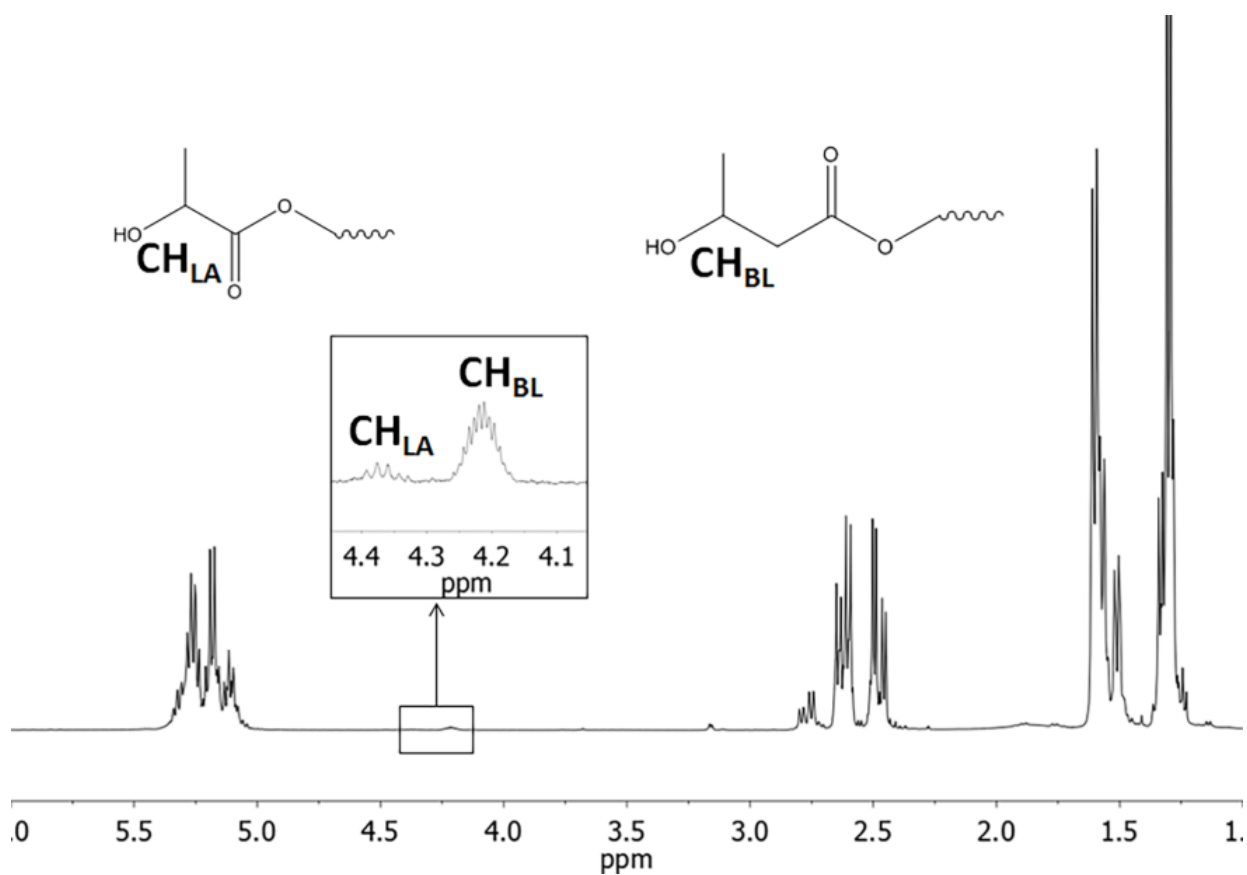

**Fig. S4**  $^1\text{H-NMR}$  spectrum ( $\text{CDCl}_3$ ;  $25^\circ\text{C}$ ) of poly(3-hydroxybutyrate)-co-poly(lactide) sample (entry 13, Table 1).



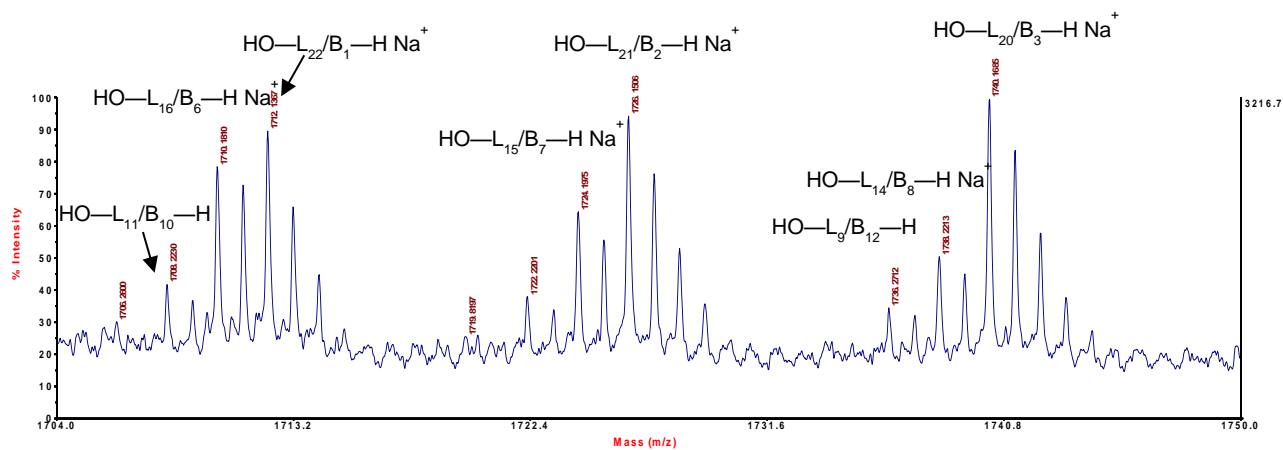

**Fig. S5c** Enlargement of figure S5a. MALDI mass spectrum in reflection mode of poly(3-hydroxybutyrate)-co-poly(lactide) sample (entry 12, Table 1). L = lactyl unit; B = butyrate unit.
